# Supplementary material for: Exploitation of a new Schiff-base ligand for boric acid fluorescent sensing in aqueous medium with bio-imaging studies in a living plant system
Source: Royal Society of Chemistry journal article supplement (doi:10.1039/c5ra08086j), 2015-01-01
Supplement: c5ra08086j1.pdf [file c5ra08086j1.pdf]

## Supporting Information

### Exploitation of a new Schiff-base ligand for boric acid fluorescent sensor in aqueous medium with bio-imaging studies in living plant system

Yeasmin Sarkar,<sup>a</sup> Sanju Das,<sup>a,b</sup> Riddhi Datta,<sup>c</sup> Sharmila Chattopadhyay,<sup>c</sup> Ambarish Ray<sup>\*b</sup> and Partha Pratim Parui<sup>\*a</sup>

<sup>a</sup>Department of Chemistry, Jadavpur University, Kolkata 700032, India, Fax: +91-33-24146223, Phone: +91-33-24146666, E-mail: parthaparui@yahoo.com; <sup>b</sup>Department of Chemistry, Maulana Azad College, Kolkata 700013, India, Fax: +91-33-22268111, Phone: +91-9836650180, E-mail: r\_ambarish@yahoo.co.in; <sup>c</sup>Drug Development Diagnostics & Biotechnology Division, Indian Institute of Chemical Biology, Kolkata 700032, India.

### Contents

|                                                                   |           |
|-------------------------------------------------------------------|-----------|
| 1. UV-Vis absorption studies of L <sub>1</sub> in presence of PBA | ... p S2  |
| 2. Comparative fluorescence intensity studies of L <sub>1</sub>   | ... p S3  |
| 3. Fluorescence studies of L <sub>1</sub> in presence of PBA      | ... p S4  |
| 4. <sup>11</sup> B NMR Spectra                                    | ... p S5  |
| 5. ESI-MS <sup>+</sup>                                            | ... p S6  |
| 6. <sup>1</sup> H NMR and <sup>13</sup> C NMR spectra             | ... p S7  |
| 7. DFT-optimized geometries                                       | ... p S8  |
| 8. Frontier molecular orbital (FMO) diagram                       | ... p S9  |
| 9. Theoretically calculated parameters                            | ... p S10 |

**1. UV-Vis absorption studies of  $L_1$  in presence of PBA:**

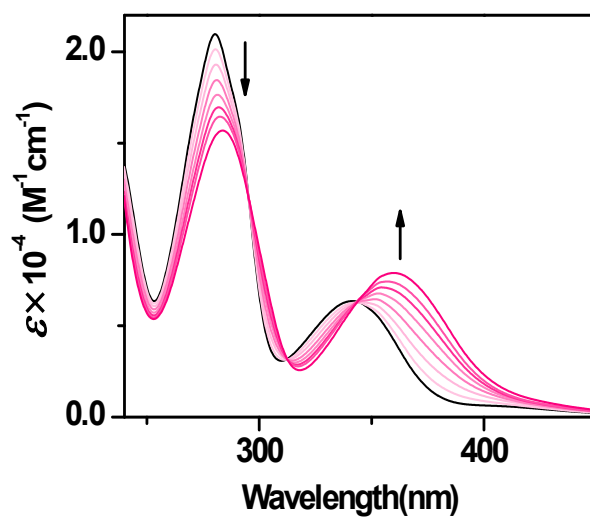

**Fig. S1** Changes in UV-Vis absorption spectra of  $L_1$  (5  $\mu\text{M}$ ), gradual addition of PBA (0–0.5 mM) in 10 mM HEPES buffer at pH 7.3 at 25°C, are depicted by arrows. Black curve is for  $L_1$ , in absence of PBA.

## 2. Comparative fluorescence intensity studies of $L_1$ :

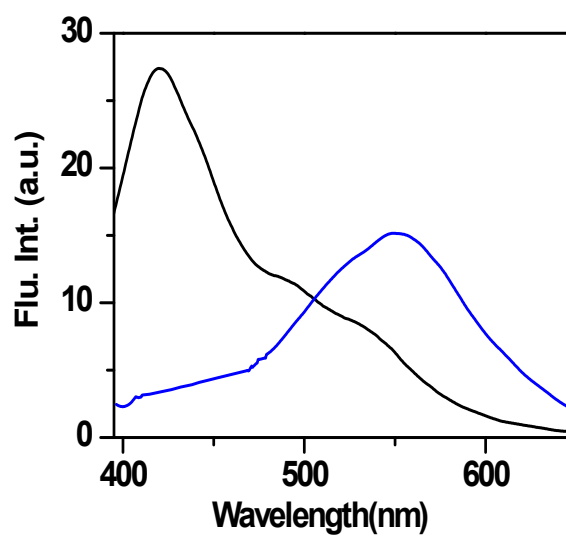

**Fig. S2** The fluorescence response of  $L_1$  (5  $\mu$ M) in acetonitrile (black) and in 10 mM HEPES, pH-7.3 (blue) at 370-nm excitation.

### 3. Fluorescence studies of L<sub>1</sub> in presence of PBA

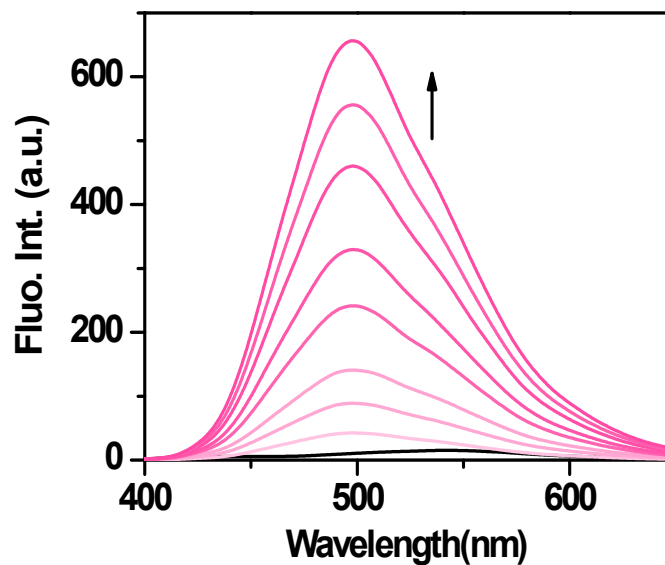

**Fig. S3** Fluorescence spectra of L<sub>1</sub> (5  $\mu$ M) as a function of increasing concentration of PBA (0–0.5 mM) in 10 mM HEPES, pH 7.3 for 370-nm excitation. Black spectra represent without addition of PBA. The gradual increase in intensity for increasing amount of PBA are indicated by the arrow.

#### 4. $^{11}\text{B}$ NMR spectra:

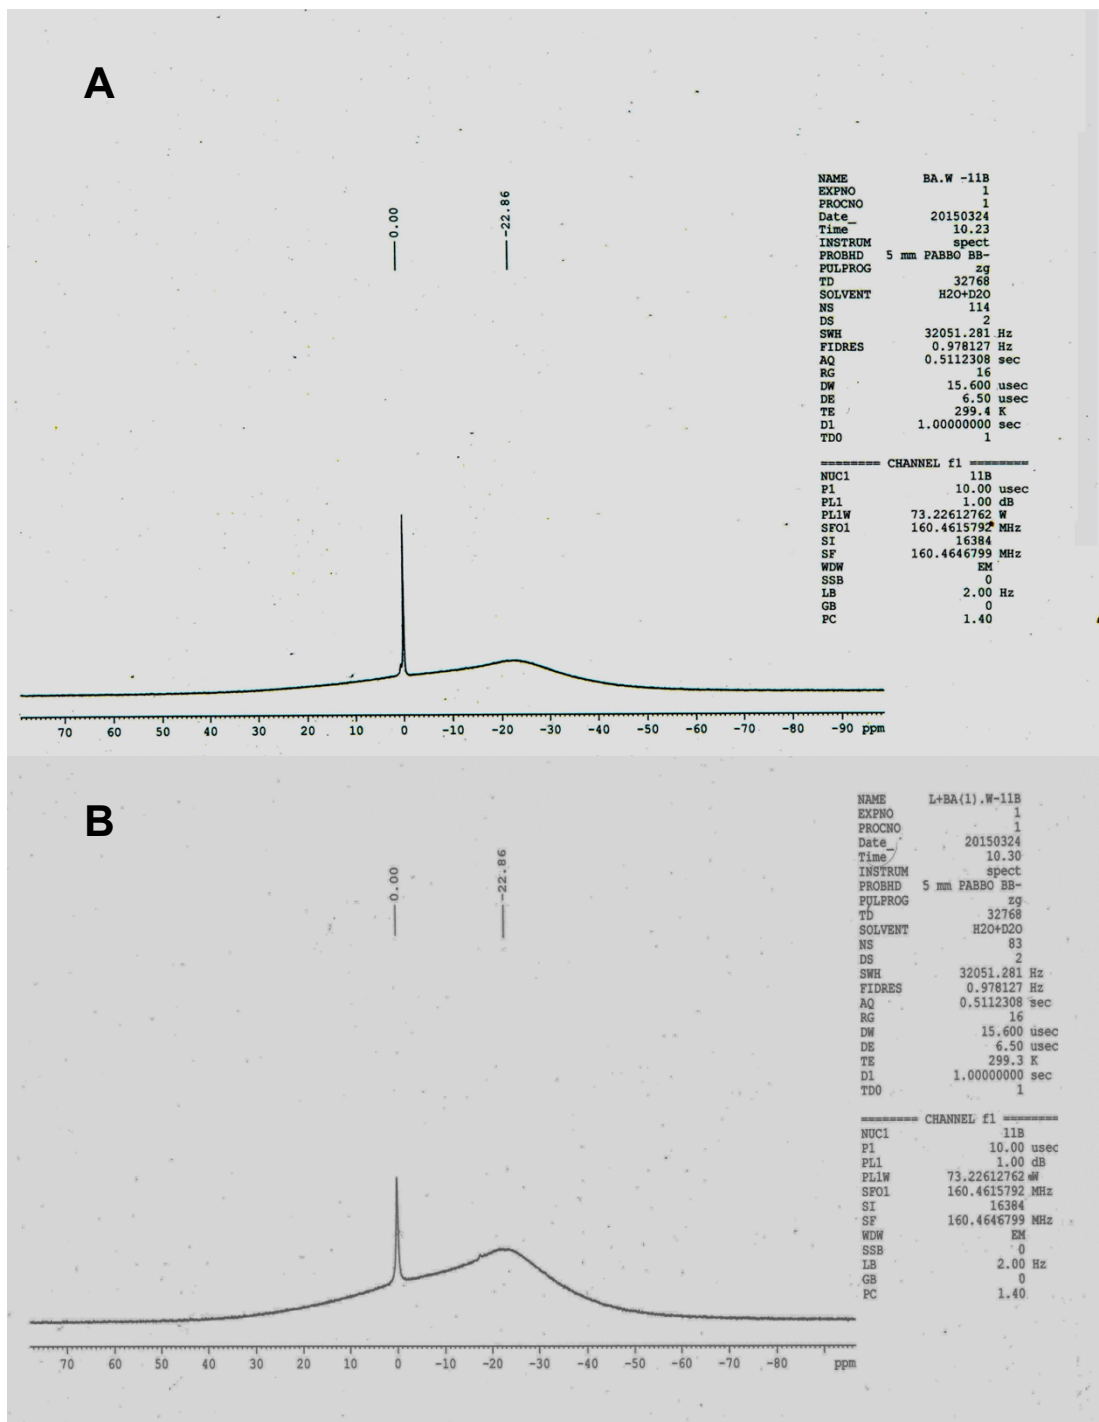

**Fig. S4**  $^{11}\text{B}$  NMR spectra in aqueous buffer medium, pH 7.3 containing 10%  $\text{D}_2\text{O}$  (A) 5 mM boric acid/borate as standard (B) 5 mM boric acid/borate+ $\text{L}_1$  (2 mM)

## 5. ESI-MS<sup>+</sup>:

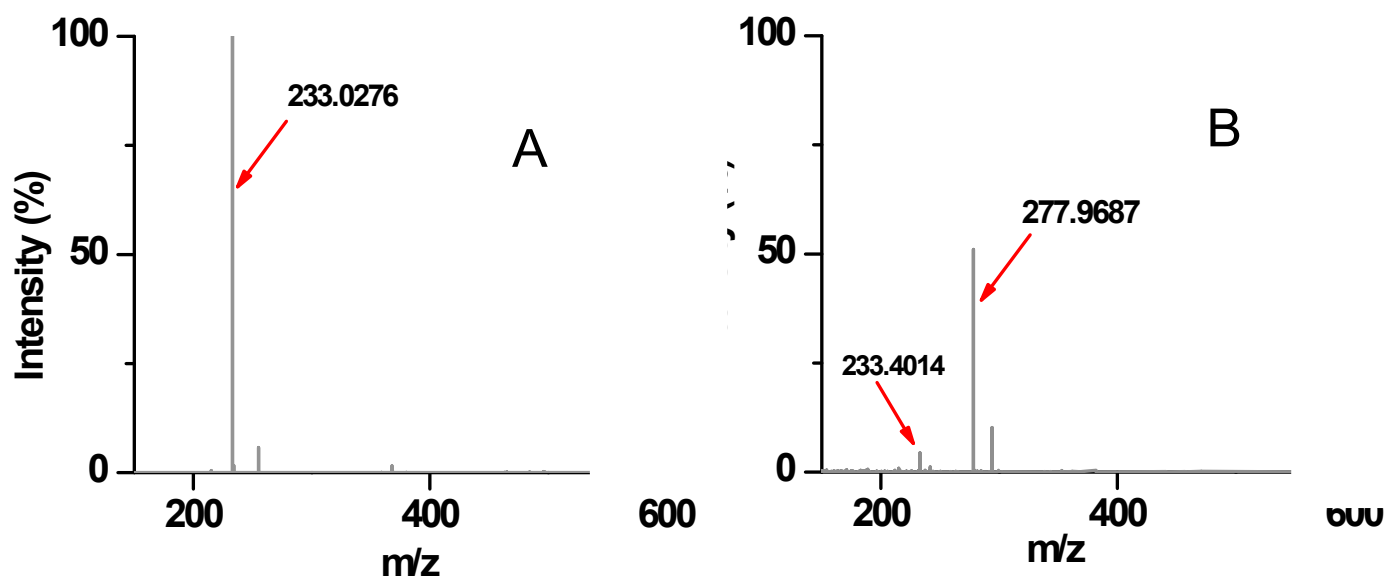

**Fig. S5** ESI-MS<sup>+</sup> of for (A)  $[L_1+H]^+$  (m/z: obs'd – 233.0726, cal'd – 233.242) and (B) for  $L_1$  in addition of BA,  $[BC_{11}O_4N_4H_{14}]^+$  (m/z: obs'd – 277.9687, calc'd – 277.0637) in water.

## 6. $^1\text{H}$ NMR and $^{13}\text{C}$ NMR spectra:

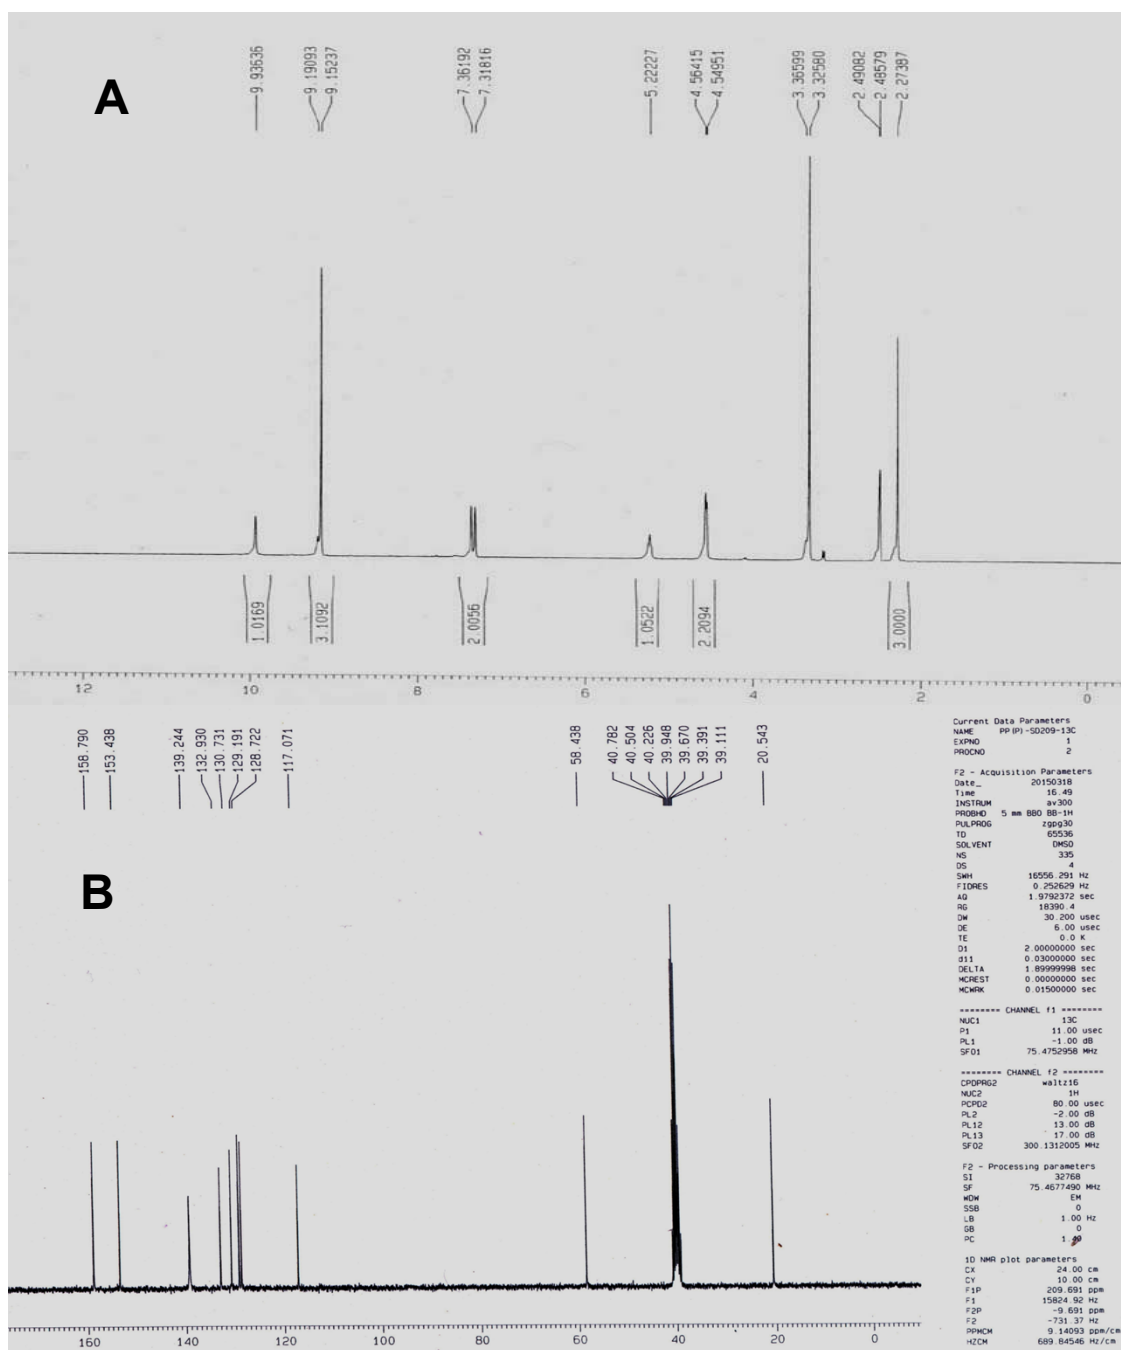

**Fig. S6** (A)  $^1\text{H}$ -NMR and (B)  $^{13}\text{C}$ -NMR spectra of  $\text{L}_1$  in  $\text{DMSO-D}_6$  solvent.

## 7. DFT-optimized geometries:

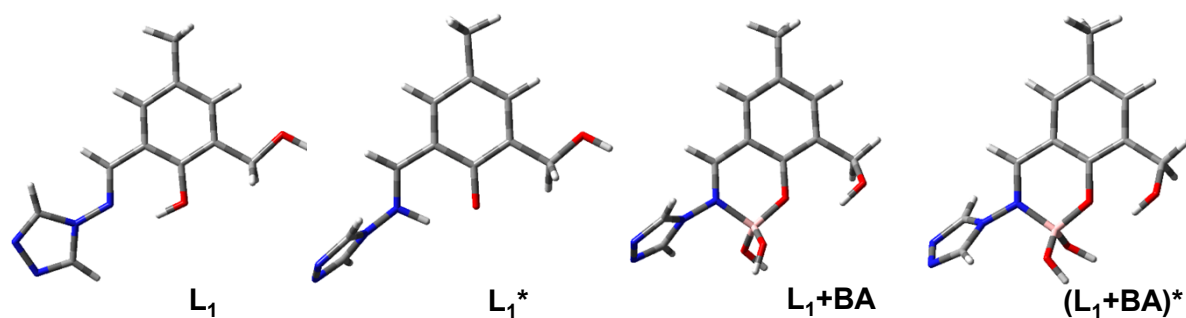

**Fig. S7** DFT-optimized ground state ( $S_0$ ) and excited state ( $S_1$ ) geometries for ligand ( $L_1$ : ground state ( $S_0$ ) and  $L_1^*$ : first excited state ( $S_1$ )) and  $L_1+BA$  ( $LB$ : ground state,  $LB^*$ : first excited state) are shown.



## 8. Frontier molecular orbital (FMO) diagram:

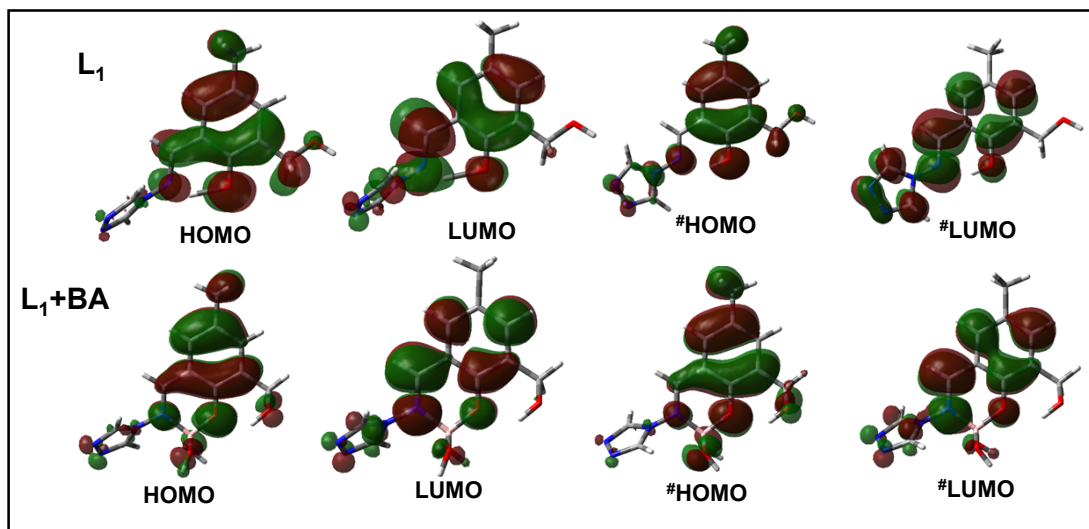

**Fig. S8** Frontier molecular orbital of  $L_1$  (upper panel) and  $L_1+BA$  (lower panel) for the optimized ground states (HOMO, LUMO) and first excited states ( $S_1$ ) (#HOMO, #LUMO) geometries are shown.

**Table S1.** Theoretically calculated UV-Vis and fluorescence parameters.

| System /state | Transition                     | energy (ev) | f <sup>1</sup> | Composition <sup>2</sup>        | Contribution (%) |
|---------------|--------------------------------|-------------|----------------|---------------------------------|------------------|
| L/GS          | S <sub>0</sub> →S <sub>1</sub> | 3.47        | 0.142          | H→L                             | 100              |
|               |                                | 4.27        | 0.623          | <sup>δ</sup> H→L                | 85               |
| L/ES          | S <sub>0</sub> →S <sub>1</sub> | 2.17        | 0.112          | H→L                             | 100              |
|               |                                | 3.00        | 0.010          | <sup>δ</sup> H→L                | 83               |
| LB/GS         | S <sub>0</sub> →S <sub>1</sub> | 3.20        | 0.100          | H→L                             | 100              |
|               |                                | 3.98        | 0.269          | <sup>δ</sup> H→L                | 52               |
|               |                                |             |                | <sup>δ</sup> H <sub>-1</sub> →L | 26               |
| LB/ES         | S <sub>0</sub> →S <sub>1</sub> | 2.45        | 0.120          | H→L                             | 100              |
|               |                                | 3.52        | 0.002          | <sup>δ</sup> H→L                | 80               |

<sup>1</sup>ossilator strength

<sup>2</sup>HOMO (H) to LUMO (L) transition from ground (GS) to its first excited state (ES) and <sup>δ</sup>H→L represents the higher energy (lower wavelength) excitation.
